# Supplementary material
Source: PubMed Central journal article supplement (PMC3719576)
Supplement: IAI.00170-13_zii999090232so1.pdf [file IAI.00170-13_zii999090232so1.pdf]

## SUPPLEMENTAL MATERIAL

### SUPPLEMENTAL RESULTS

**Microarray analysis of *F. tularensis* LVS within hepatocytes:** As described in *Materials and Methods*, the global gene expression of LVS organisms grown in FL83B hepatocytic cells for 48 hours was compared to that of bacteria cultured in broth for the same period using cDNA microarrays. Data averaged from four independent hybridizations showed that expression of 53 genes was up-regulated and that of 20 genes was down-regulated more than two-fold in intracellular bacteria, as compared to bacteria cultured in MH+; these are listed in Table S2 below. The most highly upregulated genes belong to the *fsl* operon and are discussed in the text. Most of the other genes encode hypothetical proteins with unknown functions. Most also are present in the genomes of both the LVS and the highly virulent, type A Schu S4 strain. Twelve of the 17 genes that are located in the *Francisella* pathogenicity island were up-regulated from 2.0- to 5.0-fold, including pathogenicity island gene G (*pigG*), *iglD*, *pigB*, *pigI*, *pigA*, *pigD*, *pdpC*, *pigC*, *pdpA*, *pigH*, *pdpD*, and *pdpB*. Other pathogenicity island genes also were up-regulated but to a lesser extent, including *pigE* (1.8-fold), *iglC* (1.6-fold), *iglB* (1.8-fold), and *iglA* (1.8-fold). Genes encoding MglA and MglB, which regulate expression of virulence genes and are required for growth in macrophages (1-4), were down-regulated approximately 2-fold.

1. **Baron GS, Nano FE.** 1998. MglA and MglB are required for the intramacrophage growth of *Francisella novicida*. *Mol. Microbiol.* **29**:247-259.
2. **Brotcke A, Weiss DS, Kim CC, Chain P, Malfatti S, Garcia E, Monack DM.** 2006. Identification of MglA-regulated genes reveals novel virulence factors in *Francisella tularensis*. *Infect. Immun.* **74**:6642-6655.
3. **Lauriano CM, Barker JR, Yoon SS, Nano FE, Arulanandam BP, Hassett DJ, Klose KE.** 2004. MglA regulates transcription of virulence factors necessary for *Francisella tularensis* intraamoebae and intramacrophage survival. *Proc. Natl. Acad. Sci. U. S. A* **101**:4246-4249.
4. **Santic M, Molmeret M, Klose KE, Jones S, Kwaik YA.** 2005. The *Francisella tularensis* pathogenicity island protein IglC and its regulator MglA are essential for modulating phagosome biogenesis and subsequent bacterial escape into the cytoplasm. *Cell Microbiol.* **7**:969-979.

**Table S1: Primers used in this work**

| Primer No. | Sequence <sup>a</sup>                         |
|------------|-----------------------------------------------|
| 1          | 5'-GCAAGCTGAGCATATTCTCCCAG-3'                 |
| 2          | 5'-CACTTGTAGCATGAATTGCCACTG-3'                |
| 3          | 5'-CGAGATTTACCGCAATGGC-3'                     |
| 4          | 5'-GCTTAGAGTAGGGCTTATTCCTGC-3'                |
| 5          | 5'-TGGACCGATACTGACACTGAGG-3'                  |
| 6          | 5'-AGAGCCTTTACACCGACTCC-3'                    |
| 7          | 5'-AGACgtcgacTGCTTCGCCATGCTTTATCATC-3'        |
| 8          | 5'-AGACcatatgCCAATATGACAATGTAGCCCAGC-3'       |
| 9          | 5'-AGACcatatgTGAGCTAGGACGTAGTTTGGTCG-3'       |
| 10         | 5'-AGACgtcgacCTTGGCTTTAGATGGATGAACTCG-3'      |
| 11         | 5'-CCTATGGAAAAACGCCAGCAAC-3'                  |
| 12         | 5'-AATACGCAAACCGCCTCTCC-3'                    |
| 13         | 5'-TCGAGATTTACCGCAATGGC-3'                    |
| 14         | 5'-TCGCTTAGAGTAGGGCTTATTCCTG-3'               |
| 15         | 5'-TGCTTTTCTCTCCTTTTTGGGG-3'                  |
| 16         | 5'-GCTGCTATGATTATCGGGTCTGAG-3'                |
| 17         | 5'-GCCACTATCTGAAATCTATGGTCGC-3'               |
| 18         | 5'-CGAGTCCTTGAACAAAACGCC-3'                   |
| 19         | 5'-ggatccGCTCTAGTTGGCAATCCAAACTGC-3'          |
| 20         | 5'-catatgACCAATACCTTTTGCTGCAACGACT-3'         |
| 21         | 5'-catatgACACTTGCTAAAGAGGTTGTAGTCGG-3'        |
| 22         | 5'-gtcgacGCAGCCAGTAAGATTTGCCACG-3'            |
| 23         | 5'-TGATATTGGTAGTCTGTGGCTTGC-3'                |
| 24         | 5'-CATTGCGAGAATACCTGTGACAG-3'                 |
| 25         | 5'-AGACcatatgGAAATCTCTGTGGCATTTCCTGG-3'       |
| 26         | 5'-AGACacgcgtGGCAGCAAGAAATATACGCCC-3'         |
| 27         | 5'-AGACacgcgtGCAGATTGTTGAATCATTCGGTGC-3'      |
| 28         | 5'-AGACcatatgTTTACCAAGAAGCCCCTCACG-3'         |
| 29         | 5'-GGAGCCTATGGAAAAACGCC-3'                    |
| 30         | 5'-GGAGAGCCTGAACCTTTGAAGC-3'                  |
| 31         | 5'-AGTCgtcgacCAGGAACTCAAATCAAGGTATGTAAGG-3'   |
| 32         | 5'-AGTCggatccCGCCTGATTCGCTTTTATTACGACATTTC-3' |
| 33         | 5'-AGTCgtcgacGAAATCTCTGTGGCATTTCCTGG-3'       |
| 34         | 5'-AGTCggatccGGCAGCAAGAAATATACGCCC-3'         |

<sup>a</sup>The following restriction sequences are indicated in lower-case letters: Sal I: gtcgac; Nde I: catatg; MluI: acgcgt; BamH I: ggatcc.

**Table S2: Up- and down-regulated genes of the LVS grown in FL83B hepatocytic cells for 48 h in comparison with the LVS grown in MH+ broth**

| ORF in LVS <sup>a</sup> | ORF in Schu S4 <sup>a</sup> | Product                                             | Symbol      | P-Value | Fold Change |
|-------------------------|-----------------------------|-----------------------------------------------------|-------------|---------|-------------|
| FTL_1834                | FTT0027c                    | diaminopimelate decarboxylase                       | <i>fslC</i> | 4.4E-10 | 13.1        |
| FTL_1832                | FTT0029c                    | hypothetical protein                                | <i>fslA</i> | 3.8E-08 | 10.6        |
| FTL_1835                | FTT0026c                    | hypothetical protein                                | <i>fslD</i> | 5.4E-10 | 9.1         |
| FTL_1833                | FTT0028c                    | hypothetical protein                                | <i>fslB</i> | 5.1E-06 | 6.7         |
| FTL_1164                | FTT1707                     | hypothetical protein                                | <i>pigG</i> | 3.1E-09 | 5.0         |
| FTL_0675                | FTT1388                     | hypothetical protein                                |             | 3.1E-09 | 4.1         |
| FTL_0953                | FTT0677c                    | hypothetical protein                                |             | 5.4E-10 | 3.8         |
| FTL_1218                | FTT0981                     | hypothetical protein                                |             | 1.2E-06 | 3.6         |
| FTL_1160                | FTT1711c                    | intracellular growth locus, subunit D               | <i>iglD</i> | 2.6E-07 | 3.6         |
| FTL_0816                | FTT1140                     | hypothetical protein                                |             | 3.2E-10 | 3.5         |
| FTL_0867                | FTT0602c                    | hypothetical protein                                |             | 1.4E-06 | 3.5         |
| FTL_0207                | FTT0296                     | Pyrrolidone-carboxylate peptidase                   | <i>pcp</i>  | 1.5E-07 | 3.5         |
| FTL_1169                | FTT1702                     | hypothetical protein                                | <i>pigB</i> | 2.1E-07 | 3.4         |
| FTL_0473                | FTT0403                     | peptide deformylase                                 | <i>defI</i> | 1.5E-08 | 3.3         |
| FTL_1161                | FTT1710                     | hypothetical protein                                | <i>pigI</i> | 7.4E-05 | 3.1         |
| FTL_1170                | FTT1701                     | hypothetical protein                                | <i>pigA</i> | 1.9E-05 | 3.0         |
| FTL_0026                | NA <sup>b</sup>             | 3-hydroxyisobutyrate dehydrogenase                  |             | 6.1E-10 | 3.0         |
| FTL_1217                | NA <sup>b</sup>             | hypothetical protein                                |             | 2.3E-05 | 2.9         |
| FTL_0815                | NA <sup>b</sup>             | PRC-barrel                                          |             | 3.0E-07 | 2.9         |
| FTL_1231                | FTT0970                     | hypothetical protein                                |             | 5.3E-07 | 2.9         |
| FTL_0449                | FTT0383                     | hypothetical protein                                |             | 1.2E-06 | 2.8         |
| FTL_1678                | FTT0101                     | conserved membrane hypothetical protein             |             | 7.5E-06 | 2.8         |
| FTL_1228                | FTT0973                     | hypothetical protein                                |             | 2.2E-07 | 2.8         |
| FTL_1167                | FTT1704                     | hypothetical protein                                | <i>pidD</i> | 2.0E-08 | 2.7         |
| FTL_1162                | FTT1709                     | hypothetical protein                                | <i>pdpC</i> | 2.5E-03 | 2.7         |
| FTL_1168                | FTT1703                     | conserved hypothetical protein.                     | <i>pigC</i> | 2.6E-06 | 2.7         |
| NA <sup>b</sup>         | FTT1143                     | hypothetical protein                                |             | 3.4E-06 | 2.7         |
| FTL_1219                | FTT0980                     | hypothetical protein                                |             | 5.0E-04 | 2.6         |
| FTL_1230                | FTT0971                     | cysteine desulfurase activator complex subunit SufB | <i>sufB</i> | 1.2E-06 | 2.5         |
| FTL_1172                | FTT1699                     | hypothetical protein                                | <i>pdpA</i> | 1.2E-06 | 2.5         |
| FTL_1163                | FTT1708                     | hypothetical protein                                | <i>pigH</i> | 2.6E-05 | 2.5         |
| FTL_1154                | NA <sup>b</sup>             | pseudogene                                          |             | 1.9E-07 | 2.5         |
| NA <sup>b</sup>         | FTT1143                     | hypothetical protein                                |             | 4.7E-07 | 2.4         |
| FTL_1755                | FTT0133                     | glycerol uptake facilitator protein                 | <i>glpF</i> | 1.3E-08 | 2.4         |
| FTL_1229                | FTT0972                     | ABC transporter, ATP-binding protein                | <i>sufC</i> | 2.2E-06 | 2.4         |

|                 |                 |                                                                            |              |         |      |
|-----------------|-----------------|----------------------------------------------------------------------------|--------------|---------|------|
| FTL_0924        | NA <sup>b</sup> | proton-dependent oligopeptide transporter                                  |              | 1.0E-06 | 2.4  |
| FTL_1016        | FTT0558         | short chain dehydrogenase                                                  |              | 3.9E-06 | 2.4  |
| FTL_0663        | FTT1400c        | hypothetical protein                                                       |              | 1.8E-02 | 2.3  |
| FTL_1503        | FTT0720c        | deoxyguanosinetriphosphate triphosphohydrolase                             | <i>dgt</i>   | 2.3E-05 | 2.3  |
| FTL_1790        | FTT0070c        | major facilitator superfamily (MFS) transport protein                      | <i>ampG</i>  | 2.2E-04 | 2.2  |
| FTL_0348        | NA <sup>b</sup> | pseudogene                                                                 |              | 1.2E-06 | 2.2  |
| FTL_0569        | FTT1542c        | outer membrane protein                                                     |              | 5.8E-04 | 2.2  |
| FTL_1709        | FTT1639c        | hypothetical protein                                                       |              | 5.4E-07 | 2.2  |
| FTL_0456        | FTT0390c        | 30S ribosomal protein S21                                                  | <i>rpsU</i>  | 3.4E-03 | 2.2  |
| FTL_0217        | FTT0306         | fumarate hydratase, Class II                                               | <i>fumC</i>  | 2.1E-07 | 2.1  |
| FTL_0208        | FTT0297         | hypothetical membrane protein                                              |              | 4.5E-04 | 2.1  |
| NA <sup>b</sup> | FTT0421         | pseudogene                                                                 |              | 5.7E-04 | 2.1  |
| FTL_1509        | NA <sup>b</sup> | D-alanyl-D-alanine carboxypeptidase/D-alanyl-D-alanine-endopeptidase       | <i>dacB2</i> | 1.4E-05 | 2.1  |
| FTL_1603        | FTT0461         | RNA-binding protein                                                        | <i>yhbY</i>  | 1.9E-06 | 2.0  |
| FTL_1601        | FTT0463         | tRNA/rRNA methyltransferase                                                | <i>yibK</i>  | 2.6E-05 | 2.0  |
| FTL_1156        | FTT1715c        | hypothetical protein                                                       | <i>pdpD</i>  | 4.4E-05 | 2.0  |
| FTL_1171        | FTT1700         | hypothetical protein                                                       | <i>pdpB</i>  | 1.4E-02 | 2.0  |
| NA <sup>b</sup> | FTT0852         | pseudogene                                                                 |              | 3.1E-04 | 2.0  |
| FTL_1184        | FTT1276         | macrophage growth locus, subunit B                                         | <i>mglB</i>  | 5.9E-05 | -2.0 |
| FTL_0046        | FTT1647c        | dirooorotate dehydrogenase                                                 | <i>pyrD</i>  | 7.1E-05 | -2.0 |
| FTL_0345        | FTT0849         | bile acid symporter family protein                                         |              | 1.1E-03 | -2.1 |
| FTL_0680        | FTT0563         | polyamine transporter, subunit H, ABC transporter, membrane protein        | <i>potH</i>  | 1.0E-03 | -2.1 |
| FTL_0075        | FTT1674         | riboflavin synthase beta subunit (6,7-dimethyl-8-ribityllumazine synthase) | <i>ribH</i>  | 1.2E-06 | -2.1 |
| FTL_0261        | FTT0350         | DNA-directed RNA polymerase, alpha subunit                                 | <i>rpoA2</i> | 1.8E-04 | -2.1 |
| FTL_0245        | FTT0334         | 30S ribosomal protein S17                                                  | <i>rpsQ</i>  | 1.6E-03 | -2.1 |
| FTL_1185        | FTT1275         | macrophage growth locus, subunit A                                         | <i>mglA</i>  | 4.2E-06 | -2.1 |
| FTL_1025        | FTT1061c        | 30S ribosomal protein S18                                                  | <i>rpsR</i>  | 1.2E-03 | -2.1 |
| FTL_0679        | FTT0564         | polyamine transporter, subunit I, ABC transporter, membrane protein        | <i>potI</i>  | 1.0E-02 | -2.2 |
| FTL_0045        | FTT1648c        | Orotidine 5'-phosphate decarboxylase                                       | <i>pyrF</i>  | 1.6E-07 | -2.2 |
| FTL_1118        | FTT1085         | hypothetical protein                                                       |              | 1.9E-05 | -2.2 |

|          |                 |                                                                |             |         |      |
|----------|-----------------|----------------------------------------------------------------|-------------|---------|------|
| FTL_1868 | FTT1727c        | multidrug resistance protein, membrane located                 |             | 2.4E-02 | -2.2 |
| FTL_0685 | FTT1259         | NH(3)-dependent NAD(+) synthetase                              | <i>nadE</i> | 1.5E-06 | -2.3 |
| FTL_1190 | FTT1270c        | Chaperone protein grpE (heat shock protein family 70 cofactor) | <i>grpE</i> | 3.6E-03 | -2.3 |
| FTL_0337 | NA <sup>b</sup> | pseudogene                                                     |             | 2.0E-08 | -2.4 |
| FTL_0843 | FTT1120c        | queuine tRNA-ribosyltransferase.                               | <i>tgt</i>  | 1.4E-05 | -2.4 |
| FTL_0863 | FTT0598c        | Sodium-dicarboxylate symporter family protein                  |             | 5.3E-07 | -3.0 |
| FTL_1478 | FTT1317c        | Inosine-5-monophosphate dehydrogenase                          | <i>guaB</i> | 1.3E-05 | -3.1 |
| FTL_0382 | FTT0881c        | amino acid permease                                            |             | 1.9E-08 | -3.5 |

<sup>a</sup>The open reading frame (ORF) designations are adopted from the annotations of the genomes of the LVS (GenBank Genome Accession No. NC\_007880) and Schu S4 strain (GenBank Genome Accession No. NC\_006570).

<sup>b</sup>NA denotes the absence of an ortholog in the indicated strain.
